# Supplementary material
Source: PubMed Central journal article supplement (PMC3401038)

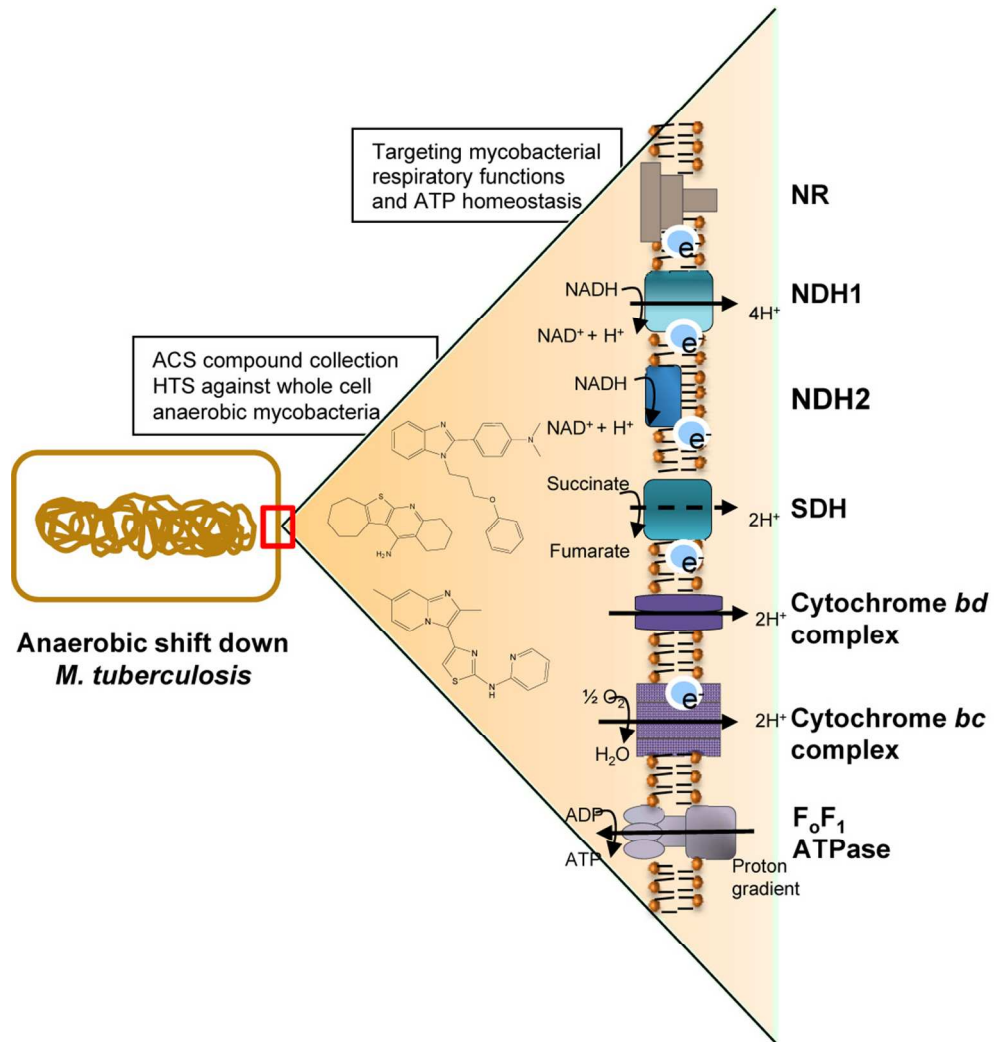

98x102mm (300 x 300 DPI)

Supplement: cb2004884_si_003.pdf [file cb2004884_si_003.pdf]
